# Supplementary material for: sRNA Profiler: A User-Focused Interface for Small RNA Mapping and Profiling
Source: MDPI journal article supplement (doi:10.3390/cells10071771), 2021-07-13
Supplement: s1 [file s1]

## Forward matchings

Gene: example\_gene.txt  
Pool: example\_pool.txt  
Mismatches: 0  
\*\*\*\*\*

Length: 5

| Sequence | Frequency |
|----------|-----------|
| GGGAT    | 3         |
| ATCCC    | 2         |
| AAACC    | 5         |

\*\*\*\*\*

Length: 6

| Sequence | Frequency |
|----------|-----------|
| TTCAGG   | 1         |
| CGGGGA   | 3         |
| CGGCTT   | 1         |

\*\*\*\*\*

## Reverse matchings

Gene: example\_gene.txt  
Pool: example\_pool.txt  
Mismatches: 0  
\*\*\*\*\*

Length: 5

| Sequence | Frequency |
|----------|-----------|
| ATCCC    | 2         |
| GGGAT    | 3         |
| TTCCC    | 1         |
| CGACC    | 2         |
| AGCCG    | 1         |
| AAGCC    | 2         |

\*\*\*\*\*

Length: 6

| Sequence | Frequency |
|----------|-----------|
| CCTGAA   | 1         |
| CGGGGA   | 3         |
| CAGGTT   | 1         |
| AGCCGA   | 1         |

\*\*\*\*\*

## Forward matchings

Gene: example\_gene.txt  
Pool: example\_pool.txt  
Mismatches: 1  
\*\*\*\*\*

Length: 5

| Sequence | Frequency |
|----------|-----------|
| TCAGG    | 1         |
| GGGAT    | 5         |
| GATCC    | 1         |
| ATCCC    | 8         |
| TCCCC    | 1         |
| GGGAA    | 4         |
| GGAAA    | 2         |
| GAAAC    | 2         |
| AAACC    | 7         |
| TCGGC    | 1         |

\*\*\*\*\*

Length: 6

| Sequence | Frequency |
|----------|-----------|
| TTCAGG   | 2         |
| CAGGGA   | 3         |
| CGGGGA   | 4         |
| GGGGAA   | 1         |
| CGGCTT   | 2         |

\*\*\*\*\*

## Reverse matchings

Gene: example\_gene.txt  
Pool: example\_pool.txt  
Mismatches: 1  
\*\*\*\*\*

Length: 5

| Sequence | Frequency |
|----------|-----------|
| CTGAA    | 1         |
| ATCCC    | 8         |
| GATCC    | 1         |
| GGGAT    | 5         |
| TCCCC    | 1         |
| TTCCC    | 4         |
| TTTCC    | 2         |
| GTTTC    | 1         |
| AGGTT    | 1         |
| CGACC    | 4         |
| AGCCG    | 5         |
| AAGCC    | 8         |

\*\*\*\*\*

Length: 6

| Sequence | Frequency |
|----------|-----------|
| CCTGAA   | 1         |
| CCCTGA   | 1         |
| CGGGGA   | 4         |
| AGGTTT   | 1         |
| CAGGTT   | 1         |
| AGCCGA   | 2         |

\*\*\*\*\*

**Figure S1 (Adkar-Purushothama et al.,)**

Forward matchings

Gene: example\_gene.txt  
Pool: example\_pool.txt  
Mismatches: 0  
\*\*\*\*\*

Length: 5

| Sequence | Frequency |
|----------|-----------|
| GGGAT    | 3         |
| ATCCC    | 2         |
| AAACC    | 5         |

\*\*\*\*\*

Length: 6

| Sequence | Frequency |
|----------|-----------|
| TTCAGG   | 1         |
| CGGGGA   | 3         |

\*\*\*\*\*

Forward matchings

Gene: example\_gene.txt  
Pool: example\_pool.txt  
Mismatches: 1  
\*\*\*\*\*

Length: 5

| Sequence | Frequency |
|----------|-----------|
| TCAGG    | 1         |
| GGGAT    | 5         |
| GATCC    | 1         |
| ATCCC    | 8         |
| TCCCC    | 1         |
| GGGAA    | 4         |
| GGAAA    | 2         |
| GAAAC    | 2         |
| AAACC    | 7         |

\*\*\*\*\*

Length: 6

| Sequence | Frequency |
|----------|-----------|
| TTCAGG   | 2         |
| CAGGGA   | 3         |
| CGGGGA   | 4         |
| GGGGAA   | 1         |

\*\*\*\*\*

Reverse matchings

Gene: example\_gene.txt  
Pool: example\_pool.txt  
Mismatches: 0  
\*\*\*\*\*

Length: 5

| Sequence | Frequency |
|----------|-----------|
| ATCCC    | 2         |
| GGGAT    | 3         |
| TTCCC    | 1         |
| CGACC    | 2         |

\*\*\*\*\*

Length: 6

| Sequence | Frequency |
|----------|-----------|
| CCTGAA   | 1         |
| CGGGGA   | 3         |
| CAGGTT   | 1         |

\*\*\*\*\*

Reverse matchings

Gene: example\_gene.txt  
Pool: example\_pool.txt  
Mismatches: 1  
\*\*\*\*\*

Length: 5

| Sequence | Frequency |
|----------|-----------|
| CTGAA    | 1         |
| ATCCC    | 8         |
| GATCC    | 1         |
| GGGAT    | 5         |
| TCCCC    | 1         |
| TTCCC    | 4         |
| TTTCC    | 2         |
| GTTTC    | 1         |
| AGGTT    | 1         |
| CGACC    | 4         |

\*\*\*\*\*

Length: 6

| Sequence | Frequency |
|----------|-----------|
| CCTGAA   | 1         |
| CCCTGA   | 1         |
| CGGGGA   | 4         |
| AGGTTT   | 1         |
| CAGGTT   | 1         |

\*\*\*\*\*

Figure S2 (Adkar-Purushothama et al.,)
